# Supplementary material for: Serum 25(OH)D concentrations and atopic diseases at age 10: results from the GINIplus and LISAplus birth cohort studies
Source: Springer Nature journal article supplement (doi:10.1186/s12887-014-0286-3), 2014-11-24
Supplement: MOESM1 [file 9746758]

| Covariates                          |                   | Baseline questionnaire |      | Questionnaire at age 1 year |      | Questionnaire at age 10 years |      | Questionnaire and medical examination at age 10 years |      | Questionnaire, medical examination and serum vitamin D available |      |
|-------------------------------------|-------------------|------------------------|------|-----------------------------|------|-------------------------------|------|-------------------------------------------------------|------|------------------------------------------------------------------|------|
|                                     |                   | N=9086 (+1*)           |      | N=7406                      |      | N=5078                        |      | N=3121                                                |      | N=2815                                                           |      |
|                                     |                   | N                      | %    | N                           | %    | N                             | %    | N                                                     | %    | N                                                                | %    |
| Sex                                 | Male              | 4576                   | 51.3 | 3826                        | 51.7 | 2590                          | 51.0 | 1588                                                  | 50.9 | 1441                                                             | 51.2 |
|                                     | Female            | 4349                   | 48.7 | 3580                        | 48.3 | 2488                          | 49.0 | 1533                                                  | 49.1 | 1374                                                             | 48.8 |
|                                     | <i>missing</i>    | 161                    |      |                             |      |                               |      |                                                       |      |                                                                  |      |
| Location of study                   | Munich            | 4414                   | 48.6 | 3585                        | 48.4 | 2670                          | 52.6 | 1685                                                  | 54.0 | 1553                                                             | 55.2 |
|                                     | Leipzig           | 976                    | 10.7 | 820                         | 11.1 | 435                           | 8.6  | 338                                                   | 10.8 | 278                                                              | 9.9  |
|                                     | Bad Honnef        | 306                    | 3.4  | 276                         | 3.7  | 207                           | 4.1  | 159                                                   | 5.1  | 148                                                              | 5.3  |
|                                     | Wesel             | 3390                   | 37.3 | 2725                        | 36.8 | 1766                          | 34.8 | 939                                                   | 30.1 | 836                                                              | 29.7 |
| Study                               | GINI Observ       | 3739                   | 41.2 | 2812                        | 38.0 | 1866                          | 36.7 | 907                                                   | 29.1 | 835                                                              | 29.7 |
|                                     | GINI Interv       | 2252                   | 24.8 | 1859                        | 25.1 | 1451                          | 28.6 | 1014                                                  | 32.5 | 923                                                              | 32.8 |
|                                     | LISA (+1)         | 3095                   | 34.1 | 2735                        | 36.9 | 1761                          | 34.7 | 1200                                                  | 38.4 | 1057                                                             | 37.6 |
| # parents w atopic diseases         | 0                 |                        |      | 3399                        | 49.2 | 2202                          | 47.2 | 1239                                                  | 43.2 | 1106                                                             | 42.7 |
|                                     | 1                 |                        |      | 2669                        | 38.6 | 1870                          | 40.1 | 1236                                                  | 43.1 | 1124                                                             | 43.4 |
|                                     | 2                 |                        |      | 845                         | 12.2 | 591                           | 12.7 | 395                                                   | 13.8 | 358                                                              | 13.8 |
|                                     | <i>missing</i>    |                        |      | 493                         |      | 415                           |      | 251                                                   |      | 227                                                              |      |
| Highest parental education          | <10 y             |                        |      | 567                         | 8.3  | 348                           | 6.5  | 170                                                   | 5.6  | 160                                                              | 5.9  |
|                                     | 10 y              |                        |      | 1940                        | 28.5 | 1314                          | 26.4 | 802                                                   | 26.6 | 706                                                              | 26.0 |
|                                     | >10y              |                        |      | 4309                        | 63.2 | 3236                          | 67.0 | 2041                                                  | 67.7 | 1850                                                             | 68.1 |
|                                     | <i>missing</i>    |                        |      | 590                         |      | 180                           |      | 108                                                   |      | 99                                                               |      |
| Breast feeding during first 4 month | Breast fed (Bf)   |                        |      | 3910                        | 53.6 | 2791                          | 56.9 | 1782                                                  | 59.2 | 1606                                                             | 59.3 |
|                                     | Bf+ Ff            |                        |      | 2583                        | 35.4 | 1639                          | 33.4 | 990                                                   | 32.9 | 893                                                              | 33.0 |
|                                     | Formular fed (Ff) |                        |      | 805                         | 11.0 | 472                           | 9.6  | 236                                                   | 7.8  | 209                                                              | 7.7  |
|                                     | <i>missing</i>    |                        |      | 108                         |      | 176                           |      | 113                                                   |      | 107                                                              |      |

\*1 Total drop out: 3096 children were recruited within LISA, consent was withdrawn from 1 child
